# Supplementary material for: Integrated analysis of bulk RNA-seq and single-cell RNA-seq reveals the function of pyrocytosis in the pathogenesis of abdominal aortic aneurysm
Source: publisher site journal article supplement (doi:10.18632/aging.205350), 2023-12-18
Supplement: Supplementary file [file aging-v15i24-205350-supplementary-material-SD3.pdf]

## SUPPLEMENTARY TABLE

Supplemental Table 2. The gene information of pyrocytosis-related genes.

| Genes  | Full-names                                             |
|--------|--------------------------------------------------------|
| AIM2   | Absent in melanoma 2                                   |
| BAK1   | BRI1-associated receptor kinase 1                      |
| BAX    | Bcl-2-associated X protein                             |
| CASP1  | Cysteine-aspartic acid protease-1                      |
| CASP3  | Cysteine-aspartic acid protease-3                      |
| CASP4  | Cysteine-aspartic acid protease-4                      |
| CASP5  | Cysteine-aspartic acid protease-5                      |
| CASP6  | Cysteine-aspartic acid protease-6                      |
| CASP8  | Cysteine-aspartic acid protease-8                      |
| CASP9  | Cysteine-aspartic acid protease-9                      |
| CHMP2A | Charged Multivesicular Body Protein 2A                 |
| CHMP2B | Charged Multivesicular Body Protein 2B                 |
| CHMP3  | Charged Multivesicular Body Protein 3                  |
| CHMP4A | Charged Multivesicular Body Protein 4A                 |
| CHMP4B | Charged Multivesicular Body Protein 4B                 |
| CHMP4C | Charged Multivesicular Body Protein 4C                 |
| CHMP6  | Charged Multivesicular Body Protein 6                  |
| CHMP7  | Charged Multivesicular Body Protein 7                  |
| CYCS   | Recombinant Cytochrome C, Somatic                      |
| ELANE  | Elastase, neutrophil expressed                         |
| GPX4   | Glutathione peroxidase 4                               |
| GSDMA  | Gasdermin A                                            |
| GSDMB  | Gasdermin B                                            |
| GSDMC  | Gasdermin C                                            |
| GSDMD  | Gasdermin D                                            |
| GSDME  | Gasdermin E                                            |
| GZMA   | Granzyme A                                             |
| GZMB   | Granzyme B                                             |
| HMGB1  | High-mobility group box-1 protein                      |
| IL18   | Interleukin 18                                         |
| IL1A   | Interleukin 1 a                                        |
| IL1B   | Interleukin 1 beta                                     |
| IL6    | Interleukin 6                                          |
| IRF1   | Interferon regulatory factor 1                         |
| IRF2   | Interferon regulatory factor 2                         |
| NLRC4  | NLR family CARD domain containing 4                    |
| NLRP1  | NLR family pyrin domain containing 1                   |
| NLRP2  | NLR family pyrin domain containing 2                   |
| NLRP3  | NLR family pyrin domain containing 3                   |
| NLRP6  | NLR family pyrin domain containing 6                   |
| NLRP7  | NLR family pyrin domain containing 7                   |
| NOD1   | Nucleotide binding oligomerization domain containing 1 |
| NOD2   | Nucleotide binding oligomerization domain containing 2 |
| PJVK   | Pejvakin/deafness, autosomal recessive 59              |

|        |                                                       |
|--------|-------------------------------------------------------|
| PLCG1  | Phospholipase C gamma 1                               |
| PRKACA | Protein kinase camp-activated catalytic subunit alpha |
| PYCARD | PYD and CARD domain containing                        |
| SCAF11 | SR-related CTD associated factor 11                   |
| TIRAP  | TIR domain containing adaptor protein                 |
| TNF    | Tumor necrosis factor                                 |
| TP53   | Tumor Protein P53                                     |
| TP63   | Tumor Protein P63                                     |

---
